# Supplementary material for: A novel MnO–CrN nanocomposite based non-enzymatic hydrogen peroxide sensor
Source: Royal Society of Chemistry journal article supplement (doi:10.1039/d1ra01485d), 2021-01-01
Supplement: d1ra01485d1.pdf [file d1ra01485d1.pdf]

## Supporting data

### Novel MnO-CrN nanocomposite based non-enzymatic peroxide sensor

Ayesha Khan Tareen<sup>1,2</sup>, Karim Khan<sup>2,3,\*</sup>, Waqas Ahmad<sup>4</sup>, Muhammad Farooq Khan<sup>5</sup>, Qudrat Ullah Khan, and Xinke liu<sup>1,\*</sup>.

1. College of Materials Science and Engineering, Shenzhen University, Nanhai Ave 3688, Shenzhen, Guangdong 518060, P. R China.
2. Institute of Microscale Optoelectronics, Collaborative Innovation Centre for Optoelectronic Science & Technology, Key Laboratory of Optoelectronic Devices and Systems of Ministry of Education and Guangdong Province, College of Physics and Optoelectronic Engineering, Shenzhen Key Laboratory of Micro-Nano Photonic Information Technology, Guangdong Laboratory of Artificial Intelligence and Digital Economy (SZ), Shenzhen University, Shenzhen 518060, P.R. China.
3. School of Electrical Engineering & Intelligentization, Dongguan University of Technology, Dongguan (DGUT), Dongguan, 523808, Guangdong Province, P. R. China.
4. International Collaborative Laboratory of 2D Materials for Optoelectronics Science and Technology of Ministry of Education, Institute of Microscale Optoelectronics, Shenzhen University, Shenzhen 518060, P. R. China.
5. Department of Electrical Engineering, Sejong University, 209 Neungdong-ro, Gwangjin-gu, 05006, South Korea.
6. College of physics and optoelectronics engineering, Shenzhen university.

\*Corresponding author: Karim Khan: [karim\\_khan\\_niazi@yahoo.com](mailto:karim_khan_niazi@yahoo.com), and Xinke liu: [xkliu@szu.edu.cn](mailto:xkliu@szu.edu.cn).

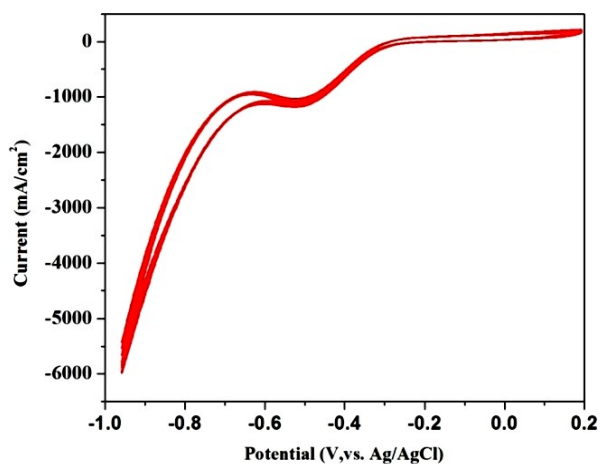

**Fig.S1.** The 20 CV cycles of modified MnO-CrN/GCE after four weeks in a solution of 5 mM H<sub>2</sub>O<sub>2</sub>. Scan rate: 100 mV/s.
